# Supplementary material for: Rapamycin Increases Collateral Circulation in Rodent Brain after Focal Ischemia as detected by Multiple Modality Dynamic Imaging
Source: PubMed Central journal article supplement (PMC6691378; doi:10.7150/thno.32676), 2019-07-09
Supplement: thnov09p4923s1.pdf [file thnov09p4923s1.pdf]

**Supplemental table**

**Table 1: General body and blood parameters before and after MCAO**

| <b>Parameter</b>             | <b>Before MCAO</b> | <b>After MCAO</b> | <b>After reperfusion</b> |
|------------------------------|--------------------|-------------------|--------------------------|
| Blood pressure (mmHg)        | 92±12              | 94±12             | 87±12                    |
| Heart rate (Beat/min)        | 400±38             | 418±3.28          | 398±43                   |
| Body temperature (°C)        | 37.0±0.3           | 37.1±0.5          | 36.8±0.5                 |
| Blood glucose (mg/dL)        | 192±23.0           | 198±25.2          | -                        |
| Blood pH                     | 7.45±0.03          | 7.46±0.06         | 7.46±0.03                |
| Blood O <sup>2</sup> (mmHg)  | 49±4.0             | 50±3.3            | 51±3.6                   |
| Blood CO <sup>2</sup> (mmHg) | 36.6±3.45          | 37.2±3.61         | 36.4±3.05                |
